# Supplementary material for: The effect of temperature on thermoelectric properties of n-type Bi2Te3 nanowire/graphene layer-by-layer hybrid composites
Source: Royal Society of Chemistry journal article supplement (doi:10.1039/c5dt00897b), 2015-01-01
Supplement: c5dt00897b1.pdf [file c5dt00897b1.pdf]

**Supplementary Information:**

**Effect of Temperature on Thermoelectric Properties of n-Type  $\text{Bi}_2\text{Te}_3$   
Nanowire/Graphene Layer-by-Layer Hybrid Composites**

Hyun Ju and Jooheon Kim\*

School of Chemical Engineering & Materials Science,  
Chung-Ang University, Seoul 156-756, Republic of Korea

\*Corresponding author: [jooheonkim@cau.ac.kr](mailto:jooheonkim@cau.ac.kr) (J. Kim)

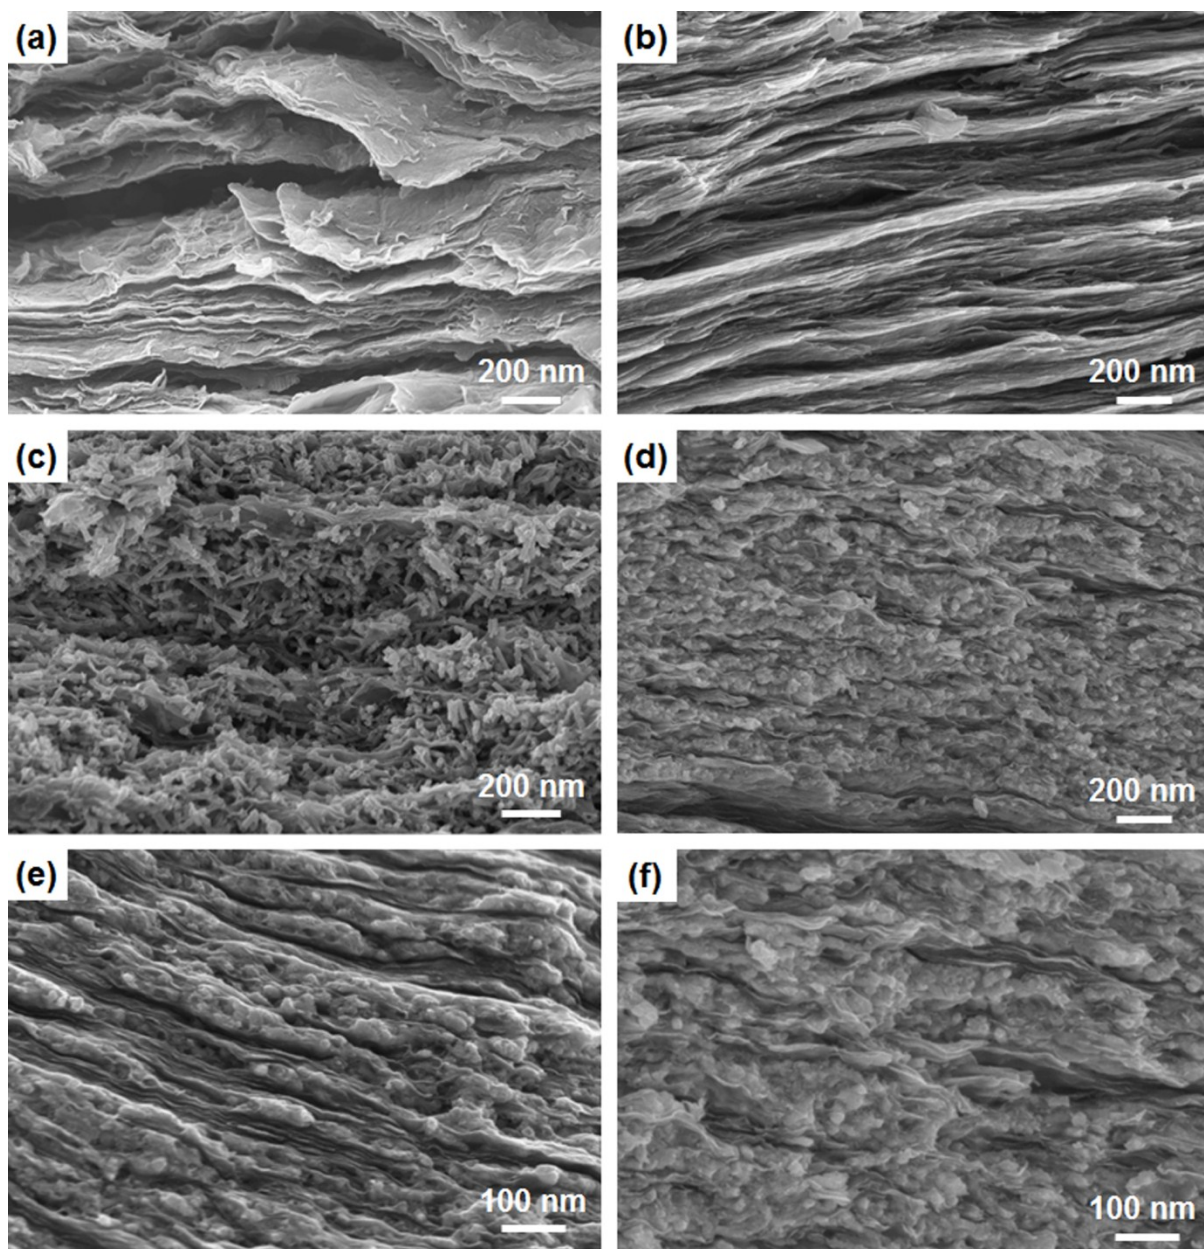

**Fig. S1.** Cross-sectional FE-SEM images of the pristine graphene sample (a) before and (b) after the sintering process. Cross-sectional FE-SEM image of (c) the synthesized  $\text{Bi}_2\text{Te}_3$  nanowire/graphene composite before sintering. (d) Low-magnification and (e,f) high-magnification FE-SEM images of synthesized composite sample sintered at 623 K.

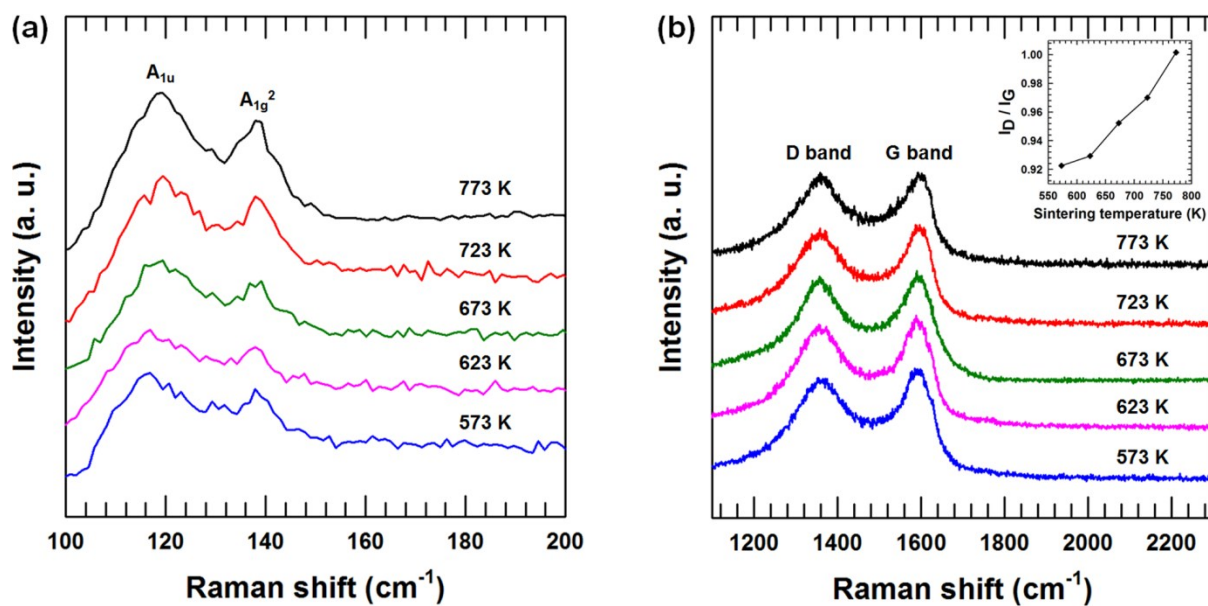

**Fig. S2.** Raman spectra of  $\text{Bi}_2\text{Te}_3$  nanowire/graphene composites for different sintering temperatures in the (a)  $\text{Bi}_2\text{Te}_3$  region (100 to 200  $\text{cm}^{-1}$ ) and the (b) graphene region (1,100 to 2,300  $\text{cm}^{-1}$ ).
